# Supplementary material for: Heart morphogenesis gene regulatory networks revealed by temporal expression analysis
Source: Oxford University Press journal article supplement (doi:10.1242/dev.154146), 2017-01-01
Supplement: dev154146supp.pdf [file dev154146supp.pdf]

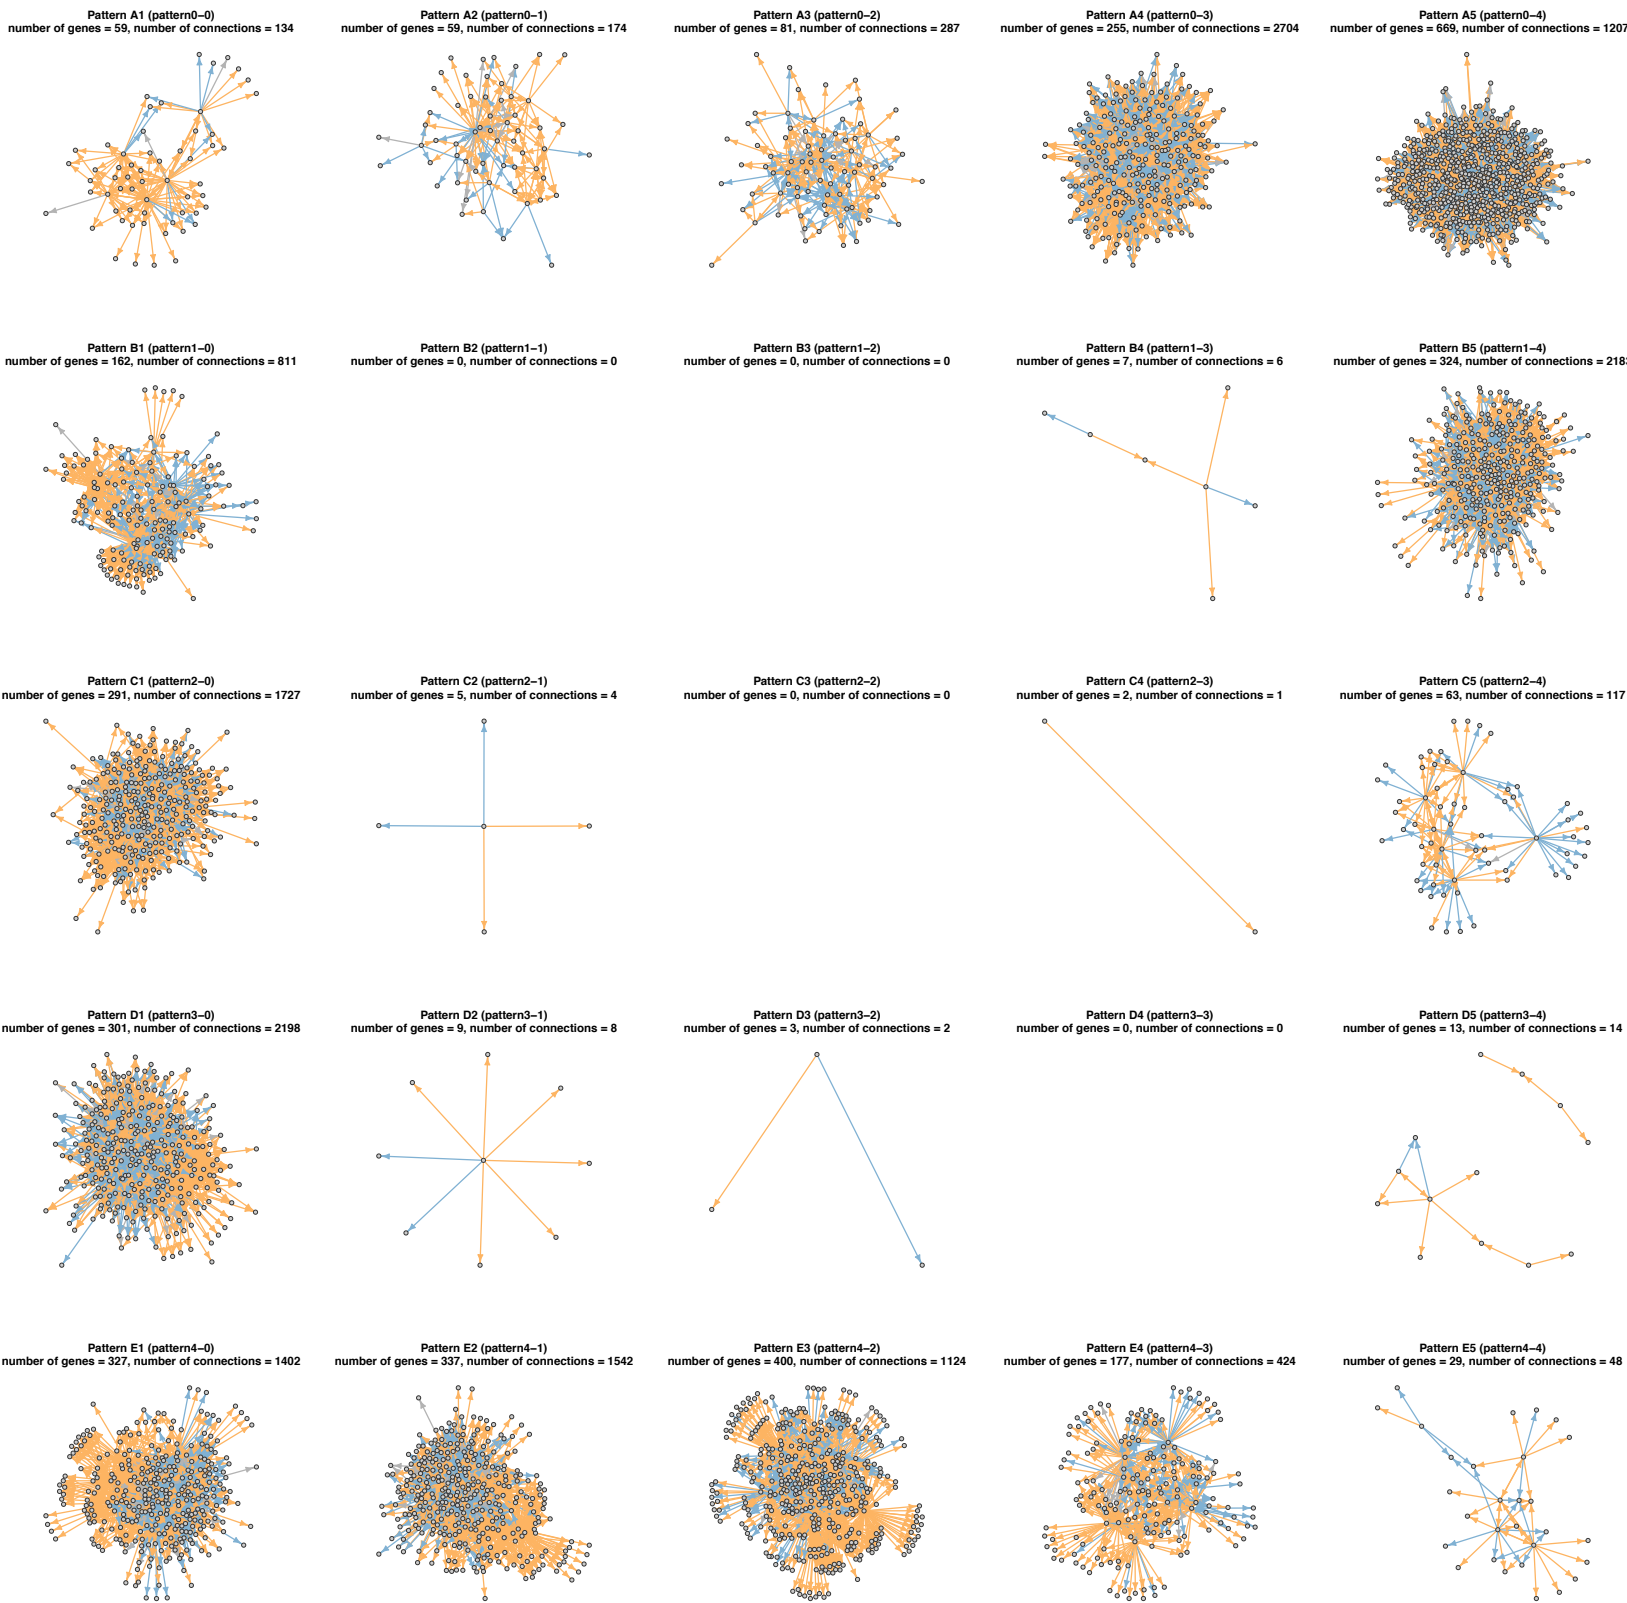

**Figure S1: Known regulatory interactions within SOM clusters.** Graph of interactions found in the GEA\_CLR database from the UCSC Interaction Browser between two genes within a single cluster. Orange lines indicate an activating interaction, blue lines are repressing interaction and grey lines are unknown.

# Distance between duplicated gene pairs when both genes are in the SOM

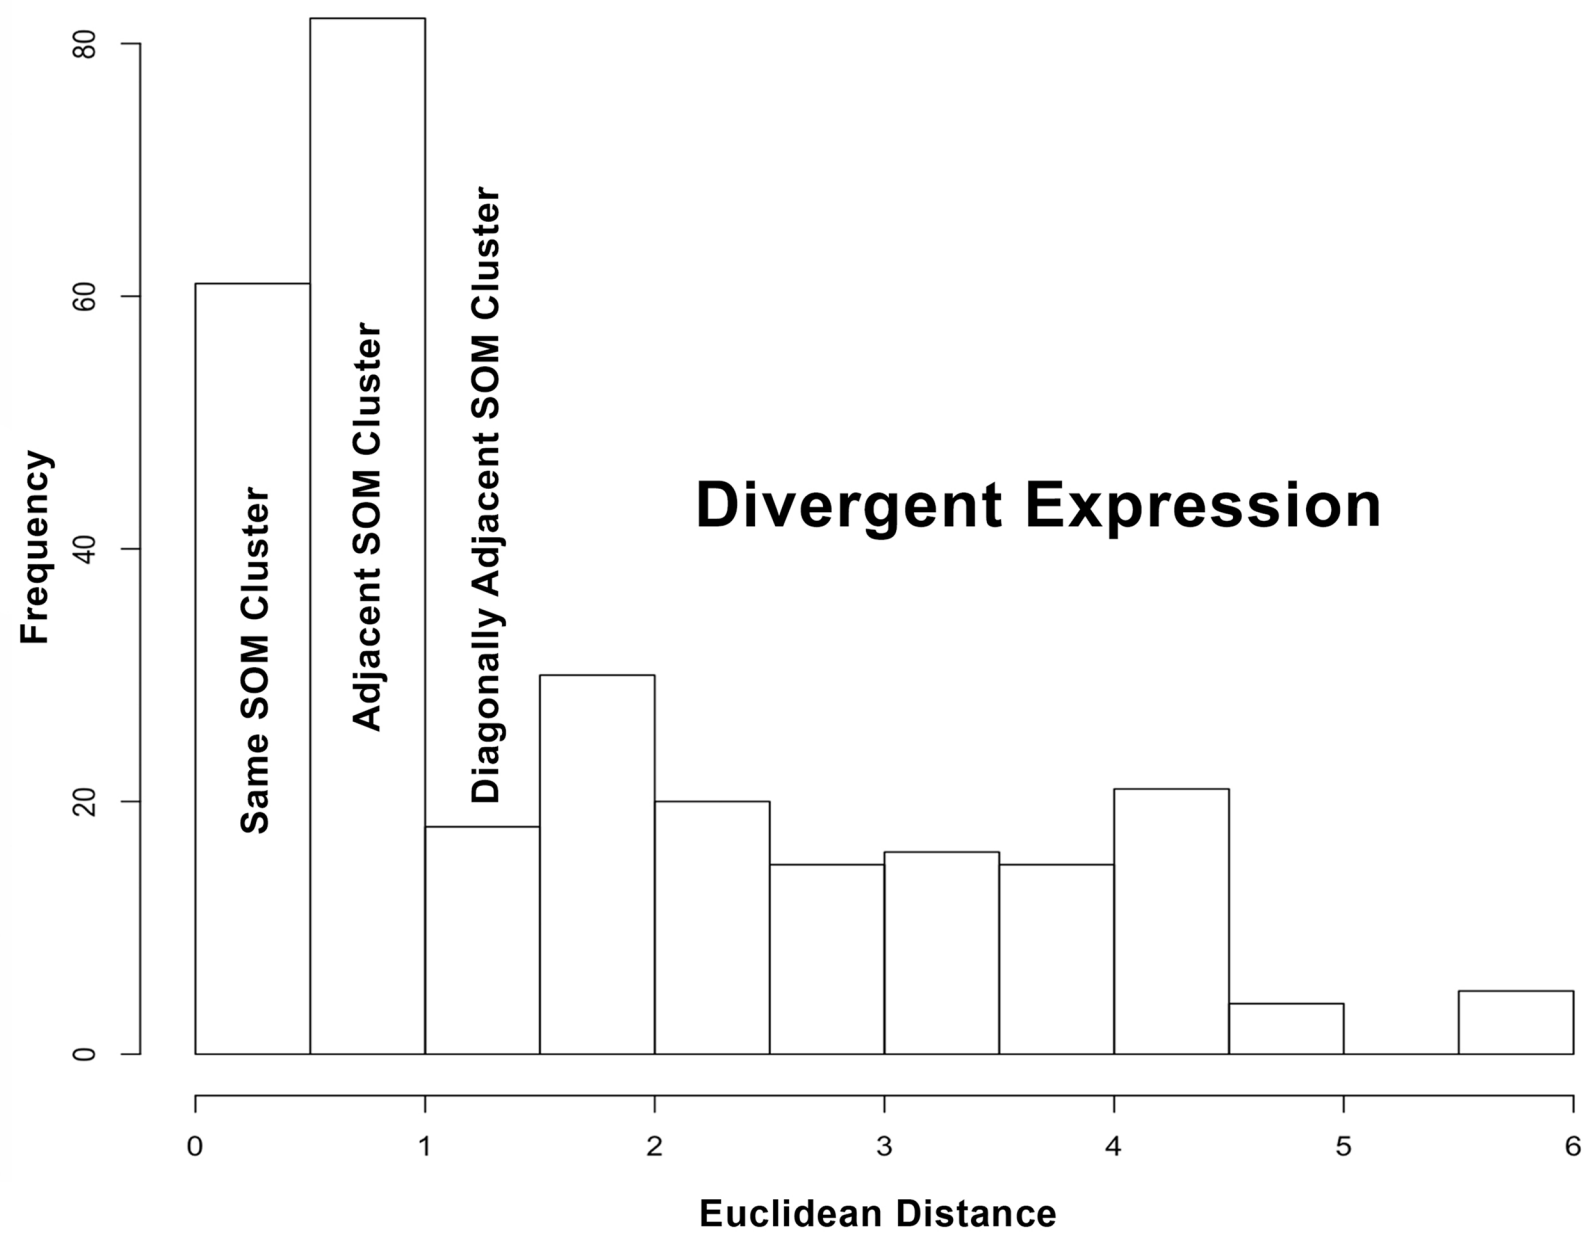

**Figure S2: Distance between pairs of duplicated genes in the SOM.** A histogram showing the distance between SOM clusters containing duplicate gene pairs arising from the teleost-specific genome duplication event. Distances were calculated using the Euclidean distance between clusters on the SOM grid. Therefore, a distance of 1 indicates that the two genes in the pair were in adjacent clusters, and a distance of 1.4 indicates that the two genes were in diagonally adjacent clusters. Any larger distances indicate that the genes were at least 2 clusters apart.

Table S1. RNAseq data and differential gene expression analysis

[Click here to Download Table S1](#)

Table S2. SOM clustering analysis

[Click here to Download Table S2](#)

Table S3. SOM cluster motif enrichment analysis

[Click here to Download Table S3](#)

Table S4. SOM assignment of Nkx2.5 differentially expressed genes

[Click here to Download Table S4](#)

Table S5. Hand-curated list of heart markers

[Click here to Download Table S5](#)

Table S6. SOM cluster assignment of duplicated zebrafish genes

[Click here to Download Table S6](#)
